# Supplementary material for: Evaluation of the impact of once weekly dulaglutide on patient-reported outcomes in Japanese patients with type 2 diabetes: comparisons with liraglutide, insulin glargine, and placebo in two randomized studies
Source: PubMed Central journal article supplement (PMC5468988; doi:10.1186/s12955-017-0696-7), 2017-06-12
Supplement: 12955_2017_696_MOESM1_ESM.pdf [file 12955_2017_696_MOESM1_ESM.pdf]

**Perceptions About Medications-Diabetes 21 Japanese version  
(PAM-D21-J) Questionnaire**

Below are some general statements that people with diabetes might mention about their diabetes medications. In the past 4 weeks, how often have the following statements about taking your injectable diabetes medication applied to you? Please circle only one number on each line.

|                                                                                                | <b>All of the time</b> | <b>Most of the time</b> | <b>Some of the time</b> | <b>None of the time</b> |
|------------------------------------------------------------------------------------------------|------------------------|-------------------------|-------------------------|-------------------------|
| The frequency with which I have to take my injectable diabetes medication is acceptable to me. | 1                      | 2                       | 3                       | 4                       |
| The amount of my new injectable medication that I need to take is acceptable to me.            | 1                      | 2                       | 3                       | 4                       |
| The timing of taking my injectable diabetes medication is acceptable to me.                    | 1                      | 2                       | 3                       | 4                       |
|                                                                                                | <b>All of the time</b> | <b>Most of the time</b> | <b>Some of the time</b> | <b>None of the time</b> |
| I feel like my injectable diabetes medication is....                                           |                        |                         |                         |                         |
| working well for me.                                                                           | 1                      | 2                       | 3                       | 4                       |
| making me feel better.                                                                         | 1                      | 2                       | 3                       | 4                       |
| keeping my blood sugars stable.                                                                | 1                      | 2                       | 3                       | 4                       |

Persons with diabetes often talk about emotional side effects from taking diabetes medications. How often, in the past 4 weeks, have you felt the following emotions as a result of taking your injectable diabetes medication? Please circle only one number on each line.

|            | <b>All of the time</b> | <b>Most of the time</b> | <b>Some of the time</b> | <b>None of the time</b> |
|------------|------------------------|-------------------------|-------------------------|-------------------------|
| Forgetful  | 1                      | 2                       | 3                       | 4                       |
| Irritable  | 1                      | 2                       | 3                       | 4                       |
| Frustrated | 1                      | 2                       | 3                       | 4                       |
| Nervous    | 1                      | 2                       | 3                       | 4                       |
| Depressed  | 1                      | 2                       | 3                       | 4                       |

Persons with diabetes often talk about physical side effects from taking diabetes medication. In the past 4 weeks, how often have you felt the following physical side effects and problems as a result of taking your injectable diabetes medication? If you experienced the side effect at all in the past 4 weeks how much were you bothered by the side effect? Please circle only one number on each line.

|                              | In the past 4 weeks, have you felt the following physical side effects or problems as a result of taking your injectable diabetes medication? |     | If you experienced this side effect in the past 4 weeks, how much were you bothered by the side effect?<br><i>If you answered "No" that you have not experienced this side effect, then please leave this question blank.</i> |              |            |             |           |
|------------------------------|-----------------------------------------------------------------------------------------------------------------------------------------------|-----|-------------------------------------------------------------------------------------------------------------------------------------------------------------------------------------------------------------------------------|--------------|------------|-------------|-----------|
|                              | No                                                                                                                                            | Yes | Not at all                                                                                                                                                                                                                    | A little bit | Moderately | Quite a bit | Extremely |
| Feet or hands swelling       | 0                                                                                                                                             | →   | 1                                                                                                                                                                                                                             | 2            | 3          | 4           | 5         |
| Headaches                    | 0                                                                                                                                             | →   | 1                                                                                                                                                                                                                             | 2            | 3          | 4           | 5         |
| Weight gain                  | 0                                                                                                                                             | →   | 1                                                                                                                                                                                                                             | 2            | 3          | 4           | 5         |
| Dizziness or lightheadedness | 0                                                                                                                                             | →   | 1                                                                                                                                                                                                                             | 2            | 3          | 4           | 5         |
| Bloating or gas              | 0                                                                                                                                             | →   | 1                                                                                                                                                                                                                             | 2            | 3          | 4           | 5         |
| Diarrhea                     | 0                                                                                                                                             | →   | 1                                                                                                                                                                                                                             | 2            | 3          | 4           | 5         |
| Excessive sweating           | 0                                                                                                                                             | →   | 1                                                                                                                                                                                                                             | 2            | 3          | 4           | 5         |
| Itching                      | 0                                                                                                                                             | →   | 1                                                                                                                                                                                                                             | 2            | 3          | 4           | 5         |
| Upset stomach (nausea)       | 0                                                                                                                                             | →   | 1                                                                                                                                                                                                                             | 2            | 3          | 4           | 5         |
| Sleepy                       | 0                                                                                                                                             | →   | 1                                                                                                                                                                                                                             | 2            | 3          | 4           | 5         |
