# Supplementary material for: Evaluation of the impact of once weekly dulaglutide on patient-reported outcomes in Japanese patients with type 2 diabetes: comparisons with liraglutide, insulin glargine, and placebo in two randomized studies
Source: PubMed Central journal article supplement (PMC5468988; doi:10.1186/s12955-017-0696-7), 2017-06-12
Supplement: 12955_2017_696_MOESM2_ESM.pdf [file 12955_2017_696_MOESM2_ESM.pdf]

## Injectable Diabetes Medication Questionnaire Japanese version (IDMQ-J)

**1. Based on your experience during the past 4 weeks, how satisfied were you with your injectable diabetes medication that you used in this study?**

**Please circle the number that best indicates your level of satisfaction.**

|                      |              |                          |                                             |                       |           |                   |
|----------------------|--------------|--------------------------|---------------------------------------------|-----------------------|-----------|-------------------|
| Very<br>dissatisfied | Dissatisfied | Somewhat<br>dissatisfied | Neither<br>satisfied<br>nor<br>dissatisfied | Somewhat<br>satisfied | Satisfied | Very<br>satisfied |
| 1                    | 2            | 3                        | 4                                           | 5                     | 6         | 7                 |

**2. Based on your experience during the past 4 weeks, to what extent do you agree that your injectable diabetes medication that you used in this study has these features?**

**For each feature, please circle the number that best indicates your level of agreement.**

| Features                                   | Strongly<br>disagree | Disagree | Slightly<br>disagree | Neither<br>agree nor<br>disagree | Slightly<br>agree | Agree | Strongly<br>agree |
|--------------------------------------------|----------------------|----------|----------------------|----------------------------------|-------------------|-------|-------------------|
| a) Easy to get the dose needed.            | 1                    | 2        | 3                    | 4                                | 5                 | 6     | 7                 |
| b) Easy to control my blood sugar.         | 1                    | 2        | 3                    | 4                                | 5                 | 6     | 7                 |
| c) Easy to carry for use away from home.   | 1                    | 2        | 3                    | 4                                | 5                 | 6     | 7                 |
| d) Easy to incorporate into my daily life. | 1                    | 2        | 3                    | 4                                | 5                 | 6     | 7                 |
| e) Convenient for me to use.               | 1                    | 2        | 3                    | 4                                | 5                 | 6     | 7                 |
| f) Not stressful for me to use.            | 1                    | 2        | 3                    | 4                                | 5                 | 6     | 7                 |

**3. Based on your experience during the past 4 weeks, to what extent do you believe that the injectable diabetes medication that you used in this study helped control your blood sugars?**

**For each question, please circle the number that best indicates how much of the time you believe your blood sugar was controlled.**

| How much of the time <u>during the past 4 weeks</u> :   | All of the time | Most of the time | A good bit of the time | Some of the time | A little of the time | None of the time |
|---------------------------------------------------------|-----------------|------------------|------------------------|------------------|----------------------|------------------|
| a) Did you feel that your diabetes was well controlled? | 1               | 2                | 3                      | 4                | 5                    | 6                |
| b) Did you feel that your blood sugars were too high?   | 1               | 2                | 3                      | 4                | 5                    | 6                |
| c) Did you feel that your blood sugars were too low?    | 1               | 2                | 3                      | 4                | 5                    | 6                |

**4. Based on your experience during the past 4 weeks, to how willing would you be to continue to use the injectable diabetes medication that you used in this study.**

**Please circle the number that best indicates your level of willingness.**

| Definitely unwilling | Mostly unwilling | Don't know | Mostly willing | Definitely willing |
|----------------------|------------------|------------|----------------|--------------------|
| 1                    | 2                | 3          | 4              | 5                  |
