# Supplementary material for: Evaluation of the impact of once weekly dulaglutide on patient-reported outcomes in Japanese patients with type 2 diabetes: comparisons with liraglutide, insulin glargine, and placebo in two randomized studies
Source: PubMed Central journal article supplement (PMC5468988; doi:10.1186/s12955-017-0696-7), 2017-06-12
Supplement: 12955_2017_696_MOESM3_ESM.pdf [file 12955_2017_696_MOESM3_ESM.pdf]

## **Ethics review boards (ERBs) which approved the monotherapy study**

|                                                                                                            |
|------------------------------------------------------------------------------------------------------------|
| Aino clinic IRB                                                                                            |
| AMC Nishi Umeda Clinic IRB                                                                                 |
| H.E.C Science Clinic IRB                                                                                   |
| Hyogo College of Medicine Hospital Institutional Review Board                                              |
| IRB of Japanese Red Cross Fukuoka Hospital                                                                 |
| Jinnouchi Hospital IRB                                                                                     |
| Kanazawa Medical Clinic Institutional Review Board                                                         |
| Kanazawa University Hospital Institutional Review board                                                    |
| Kanto Rosai Hospital IRB                                                                                   |
| Kimura Hospital Medical Corporation Yuwakai Institutional Review Board                                     |
| Manda Memorial Hospital Institutional Review Board                                                         |
| Matsumoto Nakagawa Hospital Institutional Review Board                                                     |
| Medical Corporation Heishinkai OPHAC Hospital IRB                                                          |
| Medical Corporation Shintokai Yokohama Minoru Clinic Institutional Review Board                            |
| Okada Clinic IRB                                                                                           |
| OKUGUCHI Clinic of Internal Medicine Institutional Review Board                                            |
| P-One Clinic Institutional Review Board                                                                    |
| Sapporo City General Hospital Institutional Review Board                                                   |
| Shinagawa East one Medical Clinic Institutional Review Board                                               |
| Takatsuki Red Cross Hospital IRB                                                                           |
| The Institute for Adult Diseases, Asahi Life Foundation IRB                                                |
| The Japanese Association for the Promotion of State-of-the-Art in Medicine 2nd Institutional Review Boards |
| Tokyo Medical University Hospital IRB                                                                      |
| Tokyo-Eki Center-building Clinic Institutional Review Board                                                |
| Umezu Clinic, Medical Corporation Houmankai IRB                                                            |
