# Supplementary material for: Evaluation of the impact of once weekly dulaglutide on patient-reported outcomes in Japanese patients with type 2 diabetes: comparisons with liraglutide, insulin glargine, and placebo in two randomized studies
Source: PubMed Central journal article supplement (PMC5468988; doi:10.1186/s12955-017-0696-7), 2017-06-12
Supplement: 12955_2017_696_MOESM4_ESM.pdf [file 12955_2017_696_MOESM4_ESM.pdf]

### **Ethics review boards (ERBs) which approved the combination study**

|                                                                        |
|------------------------------------------------------------------------|
| Abe Clinic IRB                                                         |
| Aichi Medical Association Institutional Review Board                   |
| AMC Nishi Umeda Clinic IRB                                             |
| Asama General Hospital Institutional Review Board                      |
| Azumi General Hospital Institutional Review Board                      |
| Ehime Prefectural Central Hospital Institutional Review Board          |
| Hakujujikai Sasebo Chuo Hospital IRB                                   |
| Hatamoto Institutional Review Board                                    |
| Iryo Houjin Hakuunkai Ryoya Komatsu Clinic Institutional Review Board  |
| JR Tokyo General Hospital Institutional Review Board                   |
| Kanazawa Medical Clinic Institutional Review Board                     |
| Kimura Hospital Medical Corporation Yuwakai Institutional Review Board |
| Kitano Hospital, the Tazuke Kofukai Medical Research Institute IRB     |
| Komoro Kosei General Hospital Institutional Review Board               |
| Kumamoto University Hospital Institutional Review Board                |
| Kyoto University Hospital Institutional Review Board                   |
| Manda Memorial Hospital Institutional Review Board                     |
| Matsumoto Nakagawa Hospital Institutional Review Board                 |
| Medical Corporation Kojinkai Sapporo Skin Clinic IRB                   |
| Oki Medical Clinic Institutional Review Board                          |
| Shinagawa East one Medical Clinic Institutional Review Board           |
| Takatsuki Red Cross Hospital IRB                                       |
| Takeda Hospital Group Institutional Review Board                       |
| Tokushukai Group Institutional Review Board                            |
| Tokyo-Eki Center-building Clinic Institutional Review Board            |
| Umezu Clinic, Medical Corporation Houmankai IRB                        |
| Yamaguchi University Hospital Institutional Review Board               |
